# Supplementary material for: Exonization of an Intronic LINE-1 Element Causing Becker Muscular Dystrophy as a Novel Mutational Mechanism in Dystrophin Gene
Source: MDPI journal article supplement (doi:10.3390/genes8100253), 2017-10-03
Supplement: s1 [file s1]

**Figure S2. Homology search bioinformatics.** The search for the origin of the 103 bp sequence identified in the patient's DMD transcripts resorted to the Basic Local Alignment Search Tool (BLAST v2.2.32, <http://blast.ncbi.nlm.nih.gov/>) at the nucleotide level.

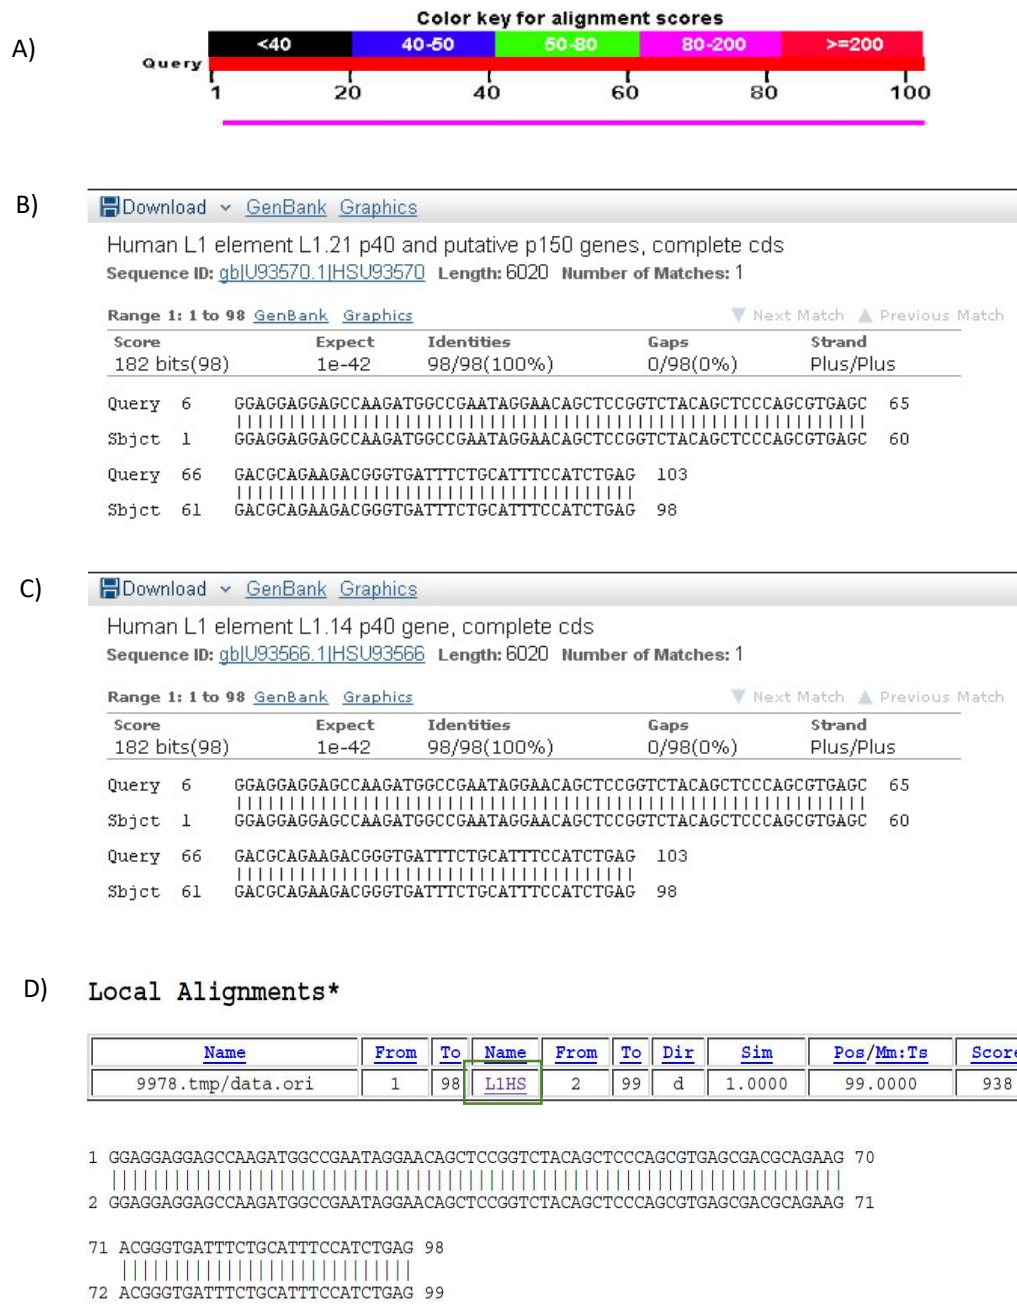

**Legend:** A) BLAST results showing that a 95.1% homology (98/103) was obtained against two human LINE-1 sequences: B) L1.21 (sequence ID: U93570) and C) L1.14 (sequence ID: U93566). D) To confirm the nature of this sequence, analysis of repetitive elements was performed using CENSOR software (<http://www.girinst.org/censor/>). Censor results showing 100% similarity with a stretch of 98 nucleotides belonging to the consensus sequence of the L1Hs family.
