# Supplementary material for: Exonization of an Intronic LINE-1 Element Causing Becker Muscular Dystrophy as a Novel Mutational Mechanism in Dystrophin Gene
Source: MDPI journal article supplement (doi:10.3390/genes8100253), 2017-10-03
Supplement: s1 [file s1]

## Data S2. LINE-1 sequence

> LINE-1\_DMD\_int51

```
1 ggaggaggag ccaagatggc cgaataggaa cagctccggt ctacagctcc cagcgtgagc
61 gacgcagaag acgggtgatt tctgcatttc catctgaggt accgggttca tctcaatagg
121 gagtgccaga cagtgggcgc aggccagtgt gtgtgcgcac cgtgcgcaag ccgaagcagg
181 gcgaggcatt gcctcacctg ggaagcgcaa ggggtcaggg agttcccttt ccgagtcaaa
241 gaaaggggtg acggacgtac ctggaaaatc gggtcactcc caccgaata ttgcgctttt
301 cagaccggct taagaaacgg cgcaccacga gactatatcc cacacctggc tcagagggtc
361 ctacgcccac ggaatctcgc tgattgctag cacagcagtc tgagatcaaa ctgcaaggcg
421 gcaacgaggg tgggggaggg gcgcccgcga ttgccagggc ttgcttaggt aaacaaagca
481 gccgggaagc tcgaactggg ttgagcccac cacagctcaa ggaggcctgc ctgcctctgt
541 aggtccacc tctgggggca gggcacagac aaacaaaaag acagcagtaa cctctgcaga
601 cttaagtgtc cctgtctgac agctttgaag agagcagtgg ttctcccagc acgcagctgg
661 agatctgaga acgggcagac tgctcctca agtgggtccc tgaccctga ccccgagca
721 gcctaactgg gaggcacccc ccagcagggg cacttgaca cctcacagg caggggtattc
781 caacagacct gcagctgagg gtcctgtctg ttagaaggaa aactaacaac cagaaaggac
841 atctacaccg aaaacccatc tgtacatcac catcatcaaa gacaaaagt agataaaacc
901 acaaagatgg ggaaaaaaca gaacagaaaa actggaaact ctaaaacgca gaggcctct
961 cctctccaa aggaacgcag ttcctcacta gcaacagaac aaagctggat ggagaatgat
1021 tttgacgagc tgagagaaga aggttcaga cgatcaaatt actctgagct acgggaggac
1081 attcaaacca aaggcaaaga agttgaaaac tttgaaaaaa atttagaaga atgtataact
1141 agaataacca atacagagaa gtgcttaaag gagctgatgg agctgaaaac caaggctcga
1201 gaactacgtg aagaatgcag aagcctcagg agccgatgcg atcaactgga agaaagggta
1261 tcagcaatgg aagatgaaat gaatgaaatg aagcgagaag ggaagttag agaaaaaga
1321 ataaaaagaa atgagcaaag cctccaagaa atatgggact atgtgaaaag accaaatcta
1381 cgtctgattg gtgtacctga aagtgatgtg gagaatggaa ccaagttgga aaacactctg
1441 caggatatta tccaggagaa cttccccaat ctgcaaggc aggccaacgt tcagattcag
1501 gaaatacaga gaacgccaca aagatactcc tcgagaagag caactccaag acacatactt
1561 gtcagattca ccaaagttga aatgaaggaa aaaatgttaa gggcagccag agagaaaagg
1621 caggttacc tcaaaggaaa gccatcaga ctaacagcgg atctctcggc agaaacccta
1681 caagccagaa gagagtgggg gccaatattc aacattctta aagaaaagaa ttttcaacc
1741 agaatttcat atccagccaa actaagcttc ataagtgaag gagaaataaa atactttata
1801 gacaagcaaa tgctgagaga ttttgtcacc accaggcctg ccctaaaaga gctcctgaag
1861 gaatcactaa acatggaaag gaacaaccgg taccagccgc tgcaaaatca tgccaaaatg
1921 taaagacatc gagactagga agaaactgca tcaactaatg agcaaaatca ccagctaaca
```

1981 tcataatgac aggatcaa at tcacacataa caatattaac tttaaataa aatggactaa  
2041 attctgcaat taaaagacac agactggcaa gttggataaa gagtcaagac ccatcagtgt  
2101 gctgtattca ggaaacccat ctcacgtgca gagacacaca taggctcaaa ataaaaggat  
2161 ggaggaagat ctaccaagca aatggaaaac aaaaaaaggc aggggttgca atcctagtct  
2221 ctgataaaac agacttcaaa ccaacgaaga tcaaaagaga caaagaaggc cattacataa  
2281 tggtaaaggg atcaattcaa caagaggagc taactatcct aaatatttat gcaccaata  
2341 caggagcacc cagattcata aagcaagtcc tcagttagct acaaagagac ttagactccc  
2401 acacattaat aatgggagac tttaacaccc cactgtcaac attagacaga tcaacgagac  
2461 agaaagtcaa caaggatacc caggaattga actcagctct gcaccaagca gacctaatag  
2521 acatctacag aactctccac ccaaatacaa cagaatatac atttttttca gcaccacacc  
2581 acacctattc caaaattgac cacatagttg gaagtaaagc tctcctcagc aaatgtaaaa  
2641 gaacagaaat tataacaaac tatctctcag accacagtgc aatcaaacta gaactcagga  
2701 ttaagaatct cactcaaagc cgctcaacta catggaaact gaacaacctg ctctgaatg  
2761 actactgggt acataacgaa atgaaggcag aaataaagat gttctttgaa accaacgaga  
2821 acaaagacac cacataccag aatctctggg acgcattcaa agcagtgtgt agagggaat  
2881 ttatagcact aaatgcctac aagagaaagc aggaagatc caaaattgac accctaact  
2941 cacaattaaa agaactagaa aagcaagagc aaacacattc aaaagctagc agaaggcaag  
3001 aaataactaa aatcagagca gaactgaagg aaatagagac acaaaaaacc cttcaaaaaa  
3061 tcaatgaatc caggagctgg ttttttgaaa ggatcaacaa aattgataga ccgctagcaa  
3121 gactaataaa gaaaaaaga gagaagaatc aaatagacac aataaaaaat gataaagggg  
3181 atatcaccac cgatcctaca gaaatacaaa ctaccatcag agaatactac aaacacctct  
3241 atgcaataaa actagaaaat ctagaagaaa tggatacatt cctcgacaca tacactctoc  
3301 caagactaaa ccaggaagaa gttgaatctc tgaatagacc aataacaggc tctgaaattg  
3361 tggcaataat caatagttaa ccaacaaaaa agagtccagg accagatgga ttcacagccg  
3421 aattctacca gaggtacaag gaggaactgg taccattcct tctgaaacta ttccaatcaa  
3481 tagaaaaaga gggaatcctc cctaactcat tttatgaggc cagcatcatt ctgataccaa  
3541 agccgggcag agacacaacc aaaaaagaga attttagacc aatatccttg atgaacattg  
3601 atgcaaaaat cctcaataaa atactggcaa accgaatcca gcagcacatc aaaaagctta  
3661 tccaccatga tcaagtgggc ttcattcctg ggatgcaagg ctggttcaat atacgcaaat  
3721 caataaatgt aatccagcat ataaacagag ccaaagacaa aaaccacatg attatctcaa  
3781 tagatgcaga aaaagccttt gacaaaattc aacaaccctt catgctaaaa actctcaata  
3841 aattaggtat tgatgggacg tatttcaaaa taataagagc tatctatgac aaaccacag  
3901 ccaatatcat actgaatggg caaaaactgg aagcattccc tttgaaaact ggcacaagac  
3961 agggatgcc tctctcaccg ctctatttca acatagtgtt ggaagtcttg gccagggcaa  
4021 tcaggcagga gaaggaaata aagggtattc aattaggaaa agaggaagtc aaattgtccc  
4081 tgtttgaga cgacatgatt gtttatctag aaaaccccat catctcagcc caaaatctcc  
4141 ttaagctgat aagcaacttc agcaaagtct caggatacaa aatcaatgta caaaaatcac

4201 aagcattctt atacaccaac aacagacaaa cagagagcca aatcatgggt gaactcccat  
4261 tcacaattgc ttcaaagaga ataaaatact taggaatcca acttacaagg gatgtgaagg  
4321 acctcttcaa ggagaactac aaaccactgc tcaaggaaat aaaagaggac acaaacaaat  
4381 ggaagaacat tccatgctca tgggtaggaa gaatcaatat cgtgaaaatg gccatactgc  
4441 ccaaggtaat ttacagattc aatgccatcc ccatcaagct accaatgact ttcttcacag  
4501 aattggaaaa aactacttta aagttcatat ggaacaaaa aagagcccg c attgccaagt  
4561 caatcctaag ccaaaagaac aaagctggag gcatcacact acctgacttc aaactatact  
4621 acaaggctac agtaacaaa acagcatggt actggtacca aaacagagat atagatcaat  
4681 ggaacagaac agagccctca gaaataatgc cgcatactca caactatctg atctttgaca  
4741 aacctgagaa aaacaagcaa tggggaaagg attccctatt taataaatgg tgctgggaaa  
4801 actggctagc catatgtaga aagctgaaac tggatccctt ctttacacct tatacaaaaa  
4861 tcaattcaag atggattaaa gacttaaatg ttagacctaa aaccataaaa accctagagg  
4921 aaaacctagg cattaccatt caggacatag gcgtgggcaa ggacttcatg tccaaaacac  
4981 caaaagcaat ggcaacaaaa accaaaattg acaaatggga tctaattaaa ctaaagagct  
5041 tttgcacagc aaaagaaact accatcagag tgaacaggca acctacaaca tgggagaaaa  
5101 tttttgcaac ctactcatct gacaaagggc taatatccag aatctacaat gaactcaaac  
5161 aaattttaca gaaaaaaca aacaaccca tcaaaaagtg ggcgaggac atgaacagac  
5221 acttctcaaa agaagacatt tatgcagcca aaaaacacat gaaaaaatgc tcatcatcac  
5281 tggccatcag agaaatgcaa atcaaaacca ctatgagata tcatctcaca ccagttagaa  
5341 tggcaatcat taaaaagtca ggaaacaaca ggtgctggag aggatgtgga gaaataggaa  
5401 cacttttaca ctgttggtgg gactgtaaac tagttcaacc attgtggaag tcagtgtggc  
5461 gattcctcag ggatctagaa ctagaaatac catttgacct agccatocca ttactgggta  
5521 tatacccaaa ggactataaa tcatgctgct ataaagacac atgcacacgt atgtttattg  
5581 cggcactatt cacaatagca aagacttgga accaacccaa atgtccaaca atgatagtct  
5641 ggattaagaa aatgtggcac atataacca tggaaatacta tgcagccata aaaaatgatg  
5701 agttcatatc cttttagggg acatggatga aattggaaac catcattctc agtaaactat  
5761 cgcaagaaca aaaaaccaa cactgcatat tctcactcat aggtgggaat tgaacaatga  
5821 gatcacatgg acacaggaag gggaatatca cactctgggg actgtggtgg ggtcggggga  
5881 ggggggaggg atagcattgg gagatatacc taatgctaga tgacacatta gtgggtgcag  
5941 tgcaccagca tggcacatgt atacatatgt aactaacctg cacaatgtgc acatgtacco  
6001 taaaactgag agtataataa aaaaaaaaaa ataaaaata aaaaaaaaaa gaaaaaaaaa  
6061 aaaaaaaaaa aaaaaaaaaa aaaaaaaaaa aaaaaa
