# Supplementary material for: Exonization of an Intronic LINE-1 Element Causing Becker Muscular Dystrophy as a Novel Mutational Mechanism in Dystrophin Gene
Source: Genes (Basel). 2017 Oct 3;8(10):253. doi: 10.3390/genes8100253 (PMC5664103; doi:10.3390/genes8100253)
Supplement: Supplementary file 1 [file genes-08-00253-s001.zip]

Archive with 5 entries (5 files):
- Data S1.pdf
- Data S2.pdf
- Figure S1.pdf
- Figure S2.pdf
- Figure S3.pdf
